# Supplementary material for: High-throughput and label-free enrichment of malignant tumor cells and clusters from pleural and peritoneal effusions using inertial microfluidics
Source: Royal Society of Chemistry journal article supplement (doi:10.1039/d2lc00082b), 2022-01-01
Supplement: d2lc00082b1.pdf [file d2lc00082b1.pdf]

## Supporting information

### **High-throughput and label-free enrichment of malignant tumor cells and clusters from pleural and peritoneal effusions using inertial microfluidics**

Zhixian Zhu<sup>1+</sup>, Shuang Li<sup>2+</sup>, Dan Wu<sup>3</sup>, Hui Ren<sup>1</sup>, Chen Ni<sup>1</sup>, Cailian Wang<sup>2\*</sup>, Nan Xiang<sup>1\*</sup>, and Zhonghua Ni<sup>1\*</sup>

<sup>1</sup>School of Mechanical Engineering, and Jiangsu Key Laboratory for Design and Manufacture of Micro-Nano Biomedical Instruments, Southeast University, Nanjing, 211189, China.

<sup>2</sup>Department of Oncology, Zhongda Hospital, Southeast University, Nanjing, 210009, China.

<sup>3</sup>Department of Oncology, Jiangyin People's Hospital, Jiangyin, 214400, China.

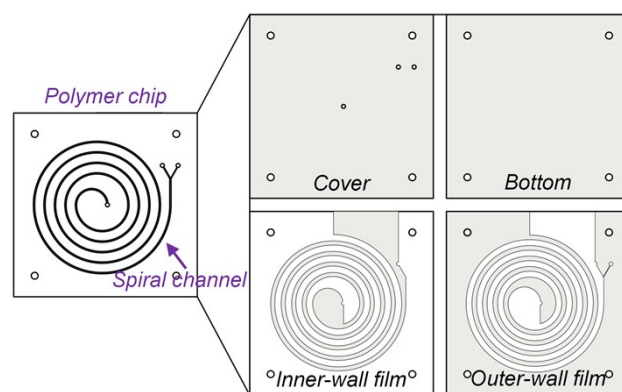

**Figure S1.** Detail patterns of the polymer microfluidic chip and each polymer film.

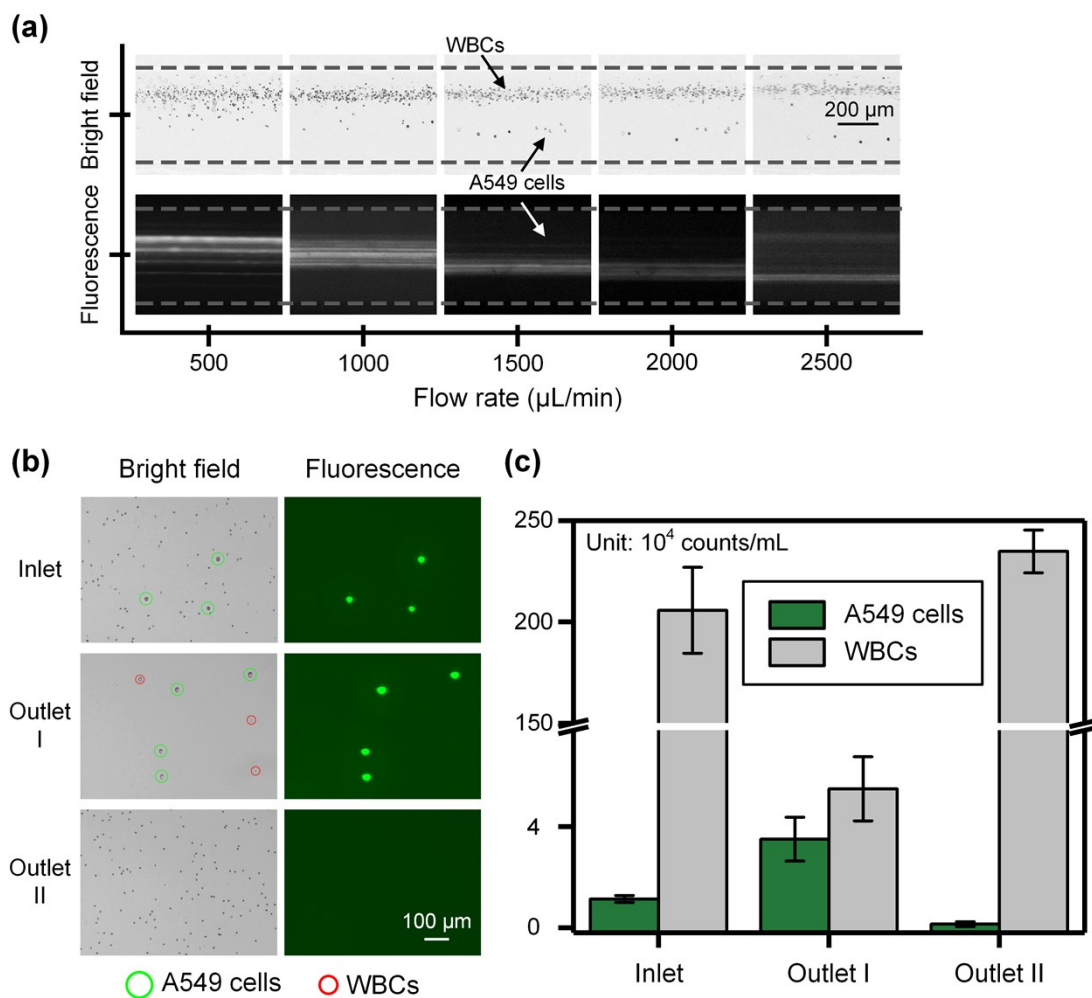

**Figure S2.** (a) Focusing maps illustrating the dynamic distributions of A549 cells and WBCs at the flow rates ranging from 500 to 2500  $\mu\text{L}/\text{min}$ . (b) Microscopic images of cells recovered from two outlets. A549 cells were discolored with green fluorescence in order to distinguish from the unlabeled WBCs. (c) Quantitative analysis of the cell concentrations sampled from inlet and two outlets.

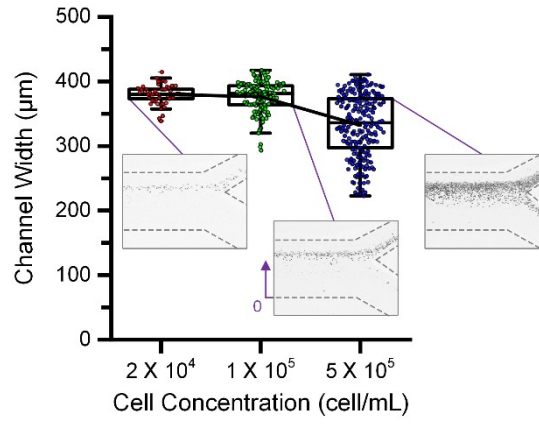

**Figure S3.** The distributions of white blood cells across the channel width under different cell concentrations ranging from  $2 \times 10^4$  to  $5 \times 10^5$  cells/mL.

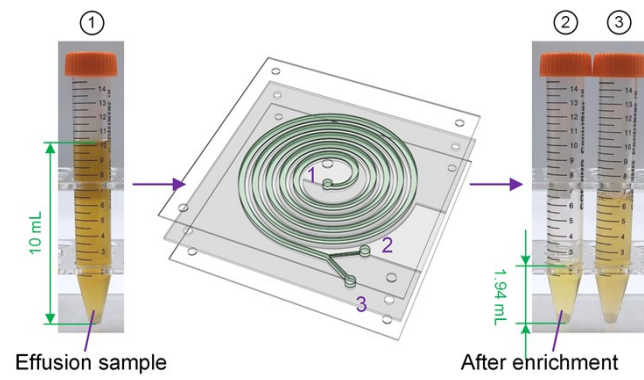

**Figure S4.** Photograph illustrating the actual sample volume of effusion after enrichment.

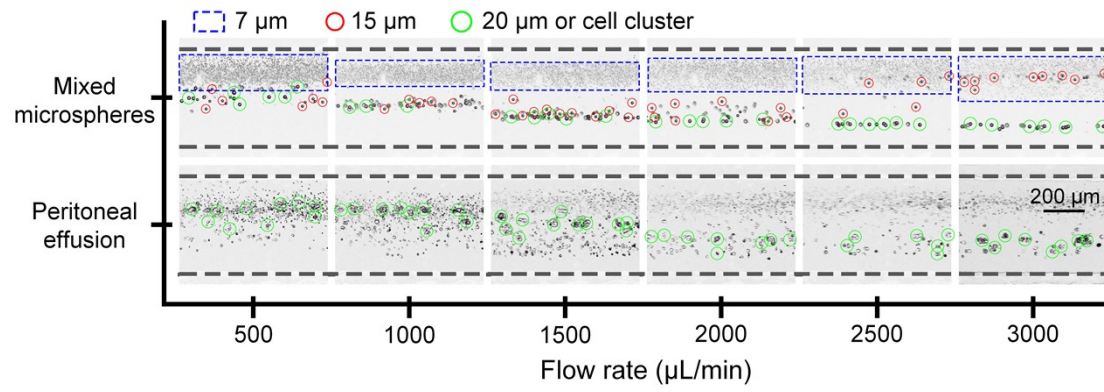

**Figure S5.** Focusing maps illustrating the dynamic distributions of mixed particles (7  $\mu\text{m}$ , 15  $\mu\text{m}$ , and 20  $\mu\text{m}$ ) and cell clusters at the flow rates ranging from 500 to 3000  $\mu\text{L}/\text{min}$ .

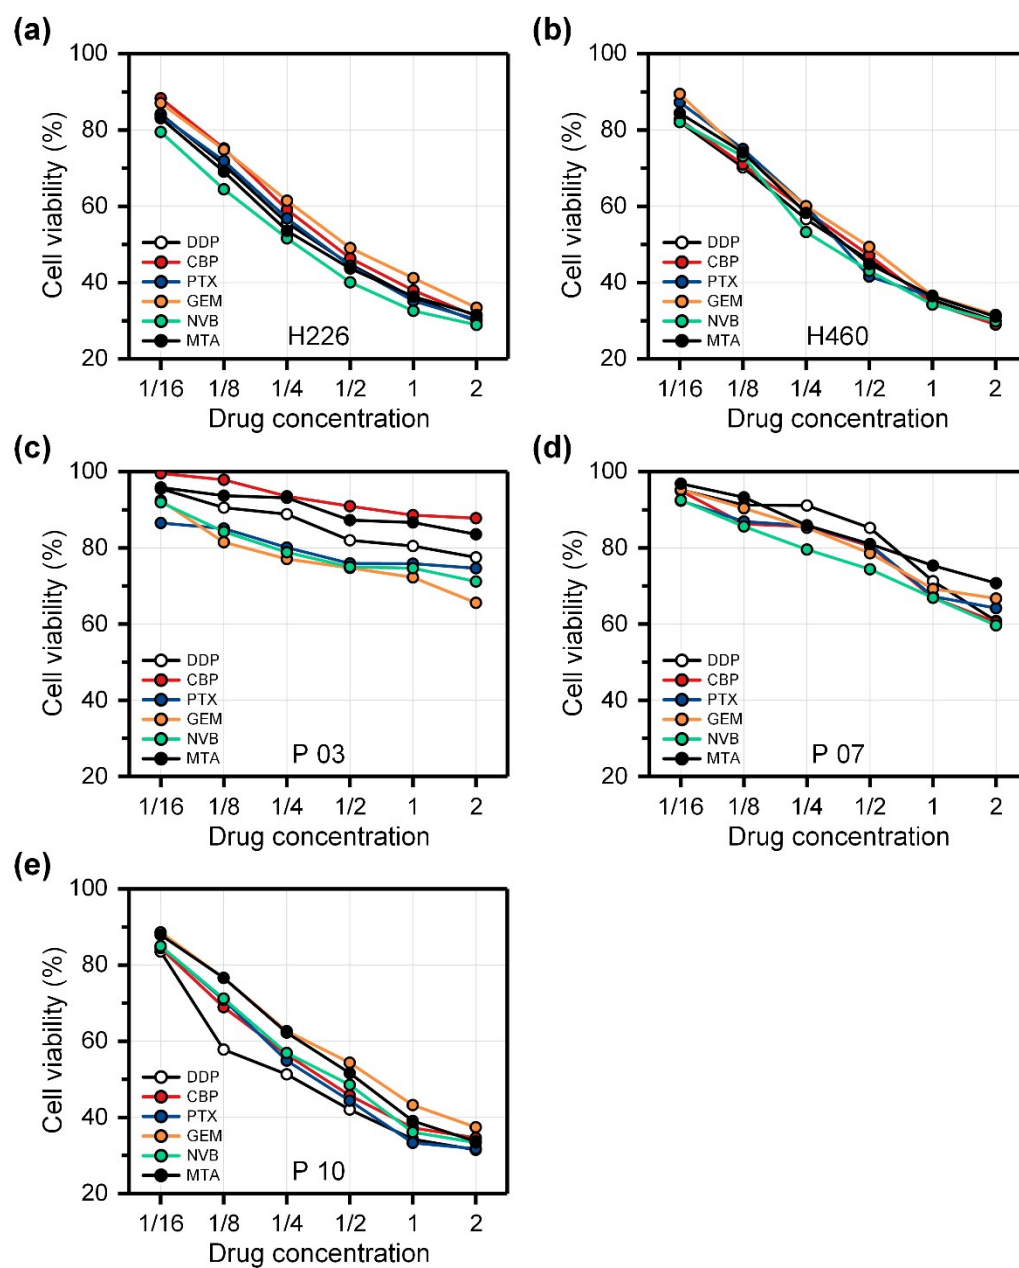

**Figure S6.** (a-e) Drug sensitivity test at the drug concentrations ranging from 1/16 to 2 times of the peak plasma concentration.

**Table S1.** Clinical and pathological data of patients.

| No. | Age/ Sex | Disease           | Stage | Treatment   | Sample              |
|-----|----------|-------------------|-------|-------------|---------------------|
| 1   | 75/M     | Lung cancer       | III   | NA          | Pleural effusion    |
| 2   | 40/F     | Lung cancer       | IV    | NA          | Pleural effusion    |
| 3   | 56/M     | Lung cancer       | IV    | PTX         | Pleural effusion    |
| 4   | 71/M     | Lung cancer       | IV    | NA          | Pleural effusion    |
| 5   | 54/M     | Lung cancer       | IV    | DDP         | Pleural effusion    |
| 6   | NA/F     | Lung cancer       | IV    | Bevacizumab | Pleural effusion    |
| 7   | 61/F     | Lung cancer       | IV    | DDP         | Pleural effusion    |
| 8   | 78/F     | Lung cancer       | IV    | Osimertinib | Pleural effusion    |
| 9   | 62/M     | Lung cancer       | NA    | NA          | Pleural effusion    |
| 10  | 66/F     | Lung cancer       | III   | NA          | Pleural effusion    |
| 11  | 53/F     | Breast cancer     | III   | Trastuzumab | Pleural effusion    |
| 12  | 76/F     | Breast cancer     | IV    | Surgery     | Pleural effusion    |
| 13  | 54/M     | Colorectal cancer | NA    | PTX         | Peritoneal effusion |
| 14  | 57/M     | Colorectal cancer | IV    | NA          | Peritoneal effusion |
| 15  | 65/M     | Colorectal cancer | IV    | NA          | Peritoneal effusion |
| 16  | 70/F     | Colorectal cancer | NA    | NA          | Peritoneal effusion |
| 17  | 68/M     | Colorectal cancer | IV    | Surgery     | Peritoneal effusion |
| 18  | 67/M     | Colorectal cancer | III   | NA          | Peritoneal effusion |
| 19  | 56/F     | Colorectal cancer | NA    | NA          | Peritoneal effusion |
| 20  | NA/F     | Ovarian cancer    | NA    | NA          | Peritoneal effusion |
| 21  | 60/F     | Ovarian cancer    | IV    | PTX         | Peritoneal effusion |
| 22  | 74/F     | Ovarian cancer    | IV    | PTX         | Peritoneal effusion |



**Table S2.** Summary of inertial microfluidics for tumor cell sorting.

| Method                                                               | Throughput              | Yield      | Purity          | Clinical Application                                                                                                         | Fabrication                               |
|----------------------------------------------------------------------|-------------------------|------------|-----------------|------------------------------------------------------------------------------------------------------------------------------|-------------------------------------------|
| Slanted spiral microfluidics <sup>1</sup>                            | 1.7 mL/min              | >80%       | 400–680 WBCs/mL | Blood of breast and lung cancer patients                                                                                     | Micro-milling technique and PDMS casting  |
| Dean-flow fractionation microfluidics <sup>3</sup>                   | 0.75 mL/min             | NA         | ~750 WBCs/mL    | Blood of breast and lung cancer patients                                                                                     | Standard photolithographic technique      |
| Dean-flow fractionation microfluidics <sup>11</sup>                  | 1.25 mL/min             | ~85%       | ~50%            | MCF-7 cells from human blood                                                                                                 | UV laser cutting                          |
| Slanted spiral microfluidics <sup>12</sup>                           | 1.7 mL/min              | NA         | NA              | Particle focusing                                                                                                            | 3D printing                               |
| Slanted spiral microfluidics <sup>2</sup>                            | 1.7 mL/min              | >85%       | NA              | urine of patients with prostate cancer                                                                                       | Micro-milling technique and PDMS casting  |
| Spiral microfluidics with periodic expansion structures <sup>5</sup> | 0.75 mL/min             | 88.6-93.5% | 25.6-35.2%      | MCF-7, Hela, and A549 cells                                                                                                  | Standard photolithographic technique      |
| Dean-flow fractionation microfluidics <sup>4</sup>                   | NA                      | 90%        | NA              | Pleural effusion in patients with lung cancer                                                                                | Micro-milling technique and PDMS casting  |
| Slanted spiral microfluidics (current work)                          | 2 mL/min (single cell)  | ~85%       | >37%            | Pleural effusion in patients with breast and lung cancer, peritoneal effusion in patients with colorectal and ovarian cancer | UV laser cutting and jigsaw puzzle method |
|                                                                      | 3 mL/min (cell cluster) |            |                 |                                                                                                                              |                                           |
